# Supplementary material for: Facile fabrication of boron and nitrogen co-doped carbon dots for “ON–OFF–ON” fluorescence sensing of Al3+ and F− ions in water samples
Source: Royal Society of Chemistry journal article supplement (doi:10.1039/d3ra02919k), 2023-01-01
Supplement: d3ra02919k1.pdf [file d3ra02919k1.pdf]

## **Electronic Supplementary Materials**

### **Facile fabrication of boron and nitrogen co-doped carbon dots for "ON-OFF-ON" fluorescence sensing of Al<sup>3+</sup> and F<sup>-</sup> ions in water samples**

**Yahya S. Alqahtani<sup>a</sup>, Ashraf M. Mahmoud<sup>a</sup>, Mater H Mahnashi<sup>a</sup>, Ramadan Ali<sup>b,c</sup>, Reem Y.**

**Shahin<sup>d</sup>, Mohamed, M. El-Wekil<sup>e</sup>, Hany A. Batakoushy<sup>f</sup>**

<sup>a</sup> Department of Pharmaceutical Chemistry, College of Pharmacy, Najran University, Najran, Saudi Arabia

<sup>b</sup> Department of Pharmaceutical Chemistry, Faculty of Pharmacy, University of Tabuk, Tabuk 71491, Saudi Arabia

<sup>c</sup> Department of Pharmaceutical Analytical Chemistry, Faculty of Pharmacy, Al Azhar University, Assiut Branch, 71526, Egypt

<sup>d</sup> Department of Pharmaceutical Chemistry, Faculty of Pharmacy, Sphinx University, New Assiut City, Assiut, Egypt

<sup>e</sup> Department of Pharmaceutical Analytical Chemistry, Faculty of Pharmacy, Assiut University, Assiut, 71526, Egypt

<sup>f</sup> Department of Pharmaceutical Analytical Chemistry, Faculty of Pharmacy, Menoufia University, Menoufia, Egypt

\*mohamed.elwakeel@pharm.aun.edu.eg, mohamed.mohamoud@ymail.com (corresponding author)

## Instrumentation

Excitation and emission spectra were measured on SCINCO FluoroMate (FS-2, Korea) spectrofluorometer with slit width of 3 nm and 1 cm quartz cuvette. Transmission Electron Microscope (TEM) was used to investigate the morphology of BN@CDs (JEOL JEM-100CX II-unit). FT-IR measurements were carried out on Nicolet™ iS™10 spectrometer. Elemental analysis (EDX) was used to show the elemental composition of BN@CDs using NEX QC+ QuantEZ. The X-ray diffraction spectrometer (XRD) PW 1710 was used to investigate the peak diffraction. Raman spectra were taken on Micro-Raman spectrometer (U.K.). Dynamic light scattering measurements (DLS) were carried out using Zetasizer Red badge instrument of ZEN 3600 Nano ZS model (Malvern, UK). X-ray photoelectron spectrometer (XPS, ESCA Ulvac-PHI 1600, PHI Quantum 2000 XPS system, Physical Electronics, USA) was used to reveal the surface functional groups of BN@CDs.

## Quantum yield (QY) measurement

The QY of the fluorescent BN@CDs was determined by a relative slope method. Quinine sulfate (QY=54% in 0.1 M H<sub>2</sub>SO<sub>4</sub>) was selected as a standard for the prepared BN@CDs. The aqueous solution of BN@CDs and quinine sulfate were diluted to keep the absorption intensity below 0.1 at the best excitation wavelength of 360. The QY of the prepared BN@CDs was calculated according to the following equation (1).

$$\varphi_x = \varphi_{st} (K_x/K_{st}) (\eta_x/\eta_{st})^2 \dots\dots\dots(1)$$

Where  $\varphi$  is the quantum yield, K is the slope of the fitted line, and  $\eta$  is the refractive index of the solvent. The subscript “x” refers to the testing sample, and “st” refers to the standards. The value of the refractive index is 1.33 for water.

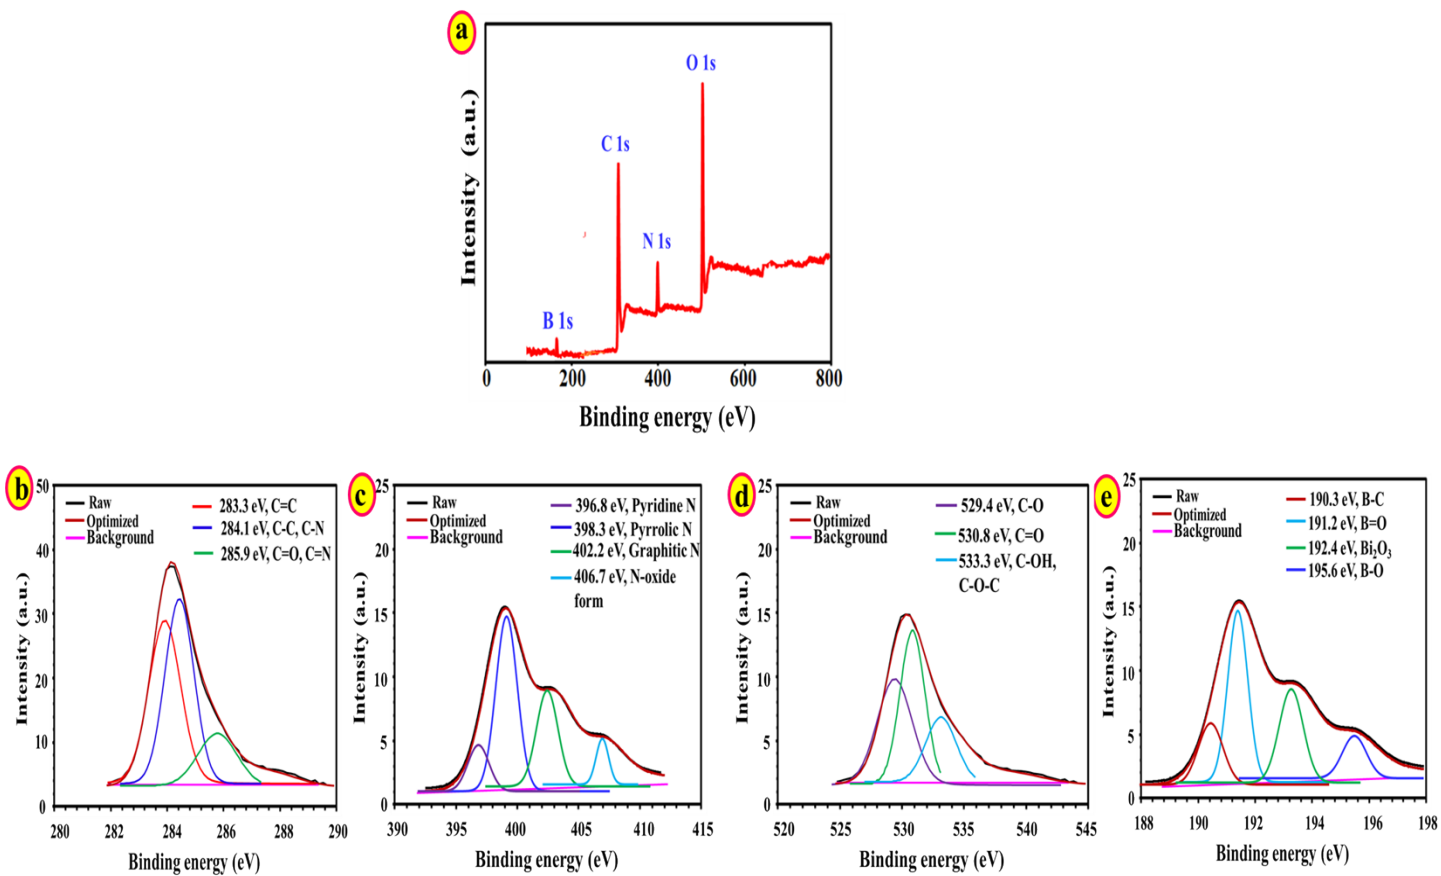

**Fig.S1** (a) XPS spectrum of BN@CDs while (b), (c), (d), and (e) are HR-XPS of C 1s, N 1s, O 1s, and B 1s, respectively.

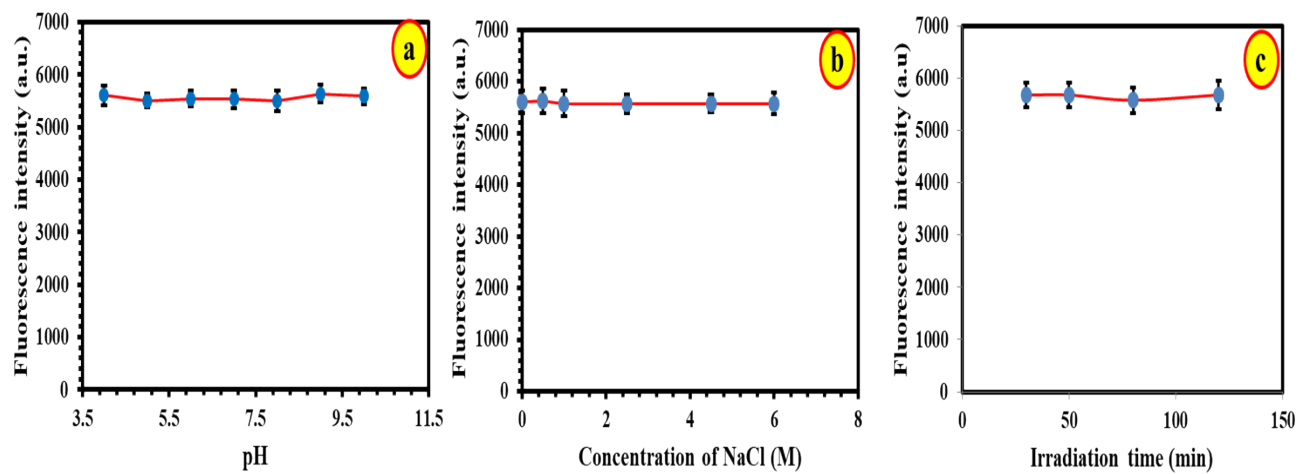

**Fig.S2** The influence of (a) different pH values, (b) ionic-strength, and (c) irradiation time on the stability of BN@CDs.

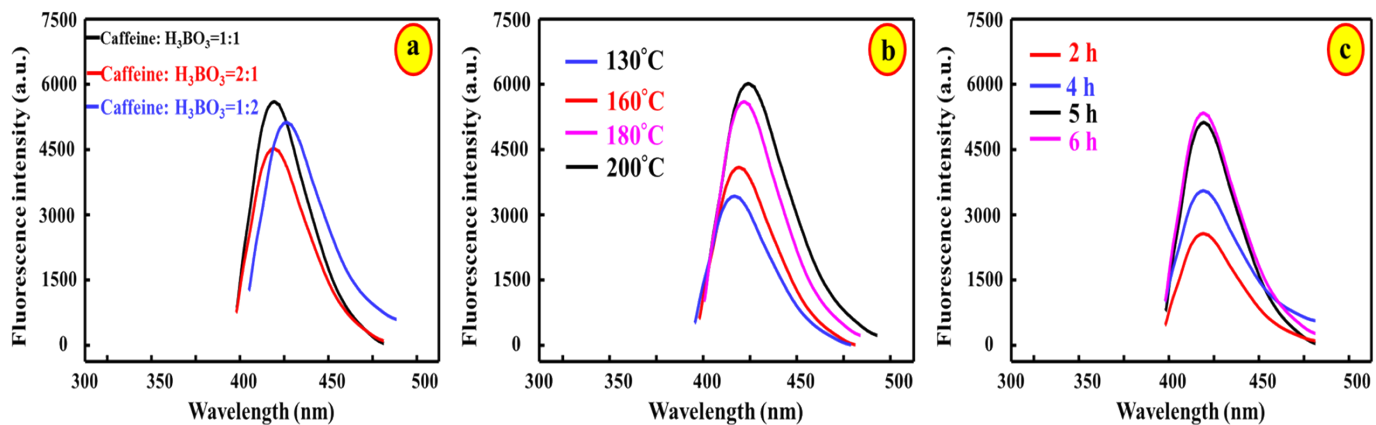

**Fig.S3** The influence of (a) molar ratio of caffeine:  $H_3BO_3$ , (b) synthesis temperature, and (c) heating time (h) on the fluorescence emission of BN@CDs.

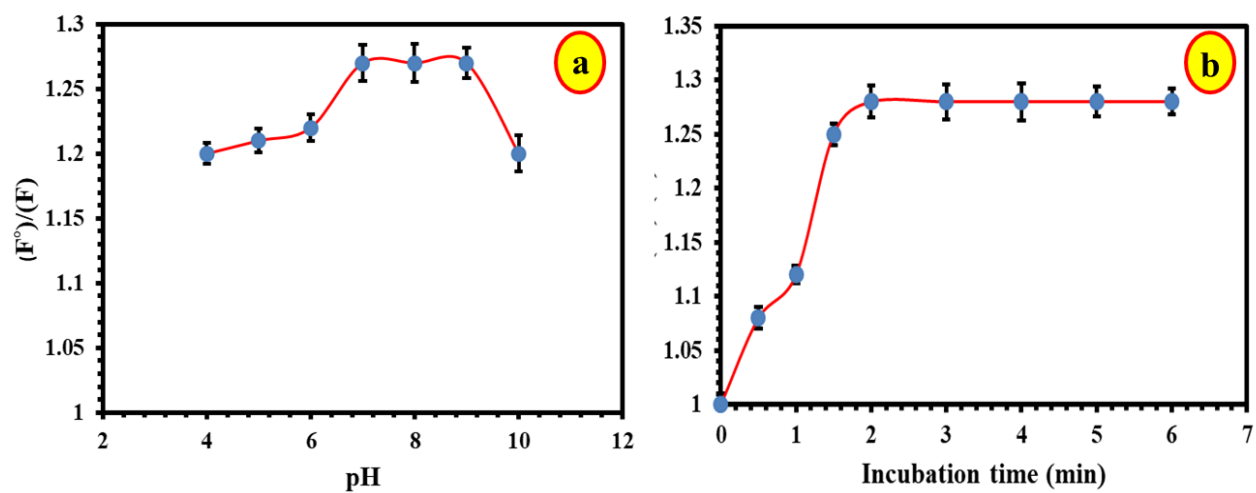

**Fig.S4** The effect of (a) pH and (b) incubation time on the fluorescence quenching of BN@CDs by 5  $\mu\text{M}$   $\text{Al}^{3+}$ .

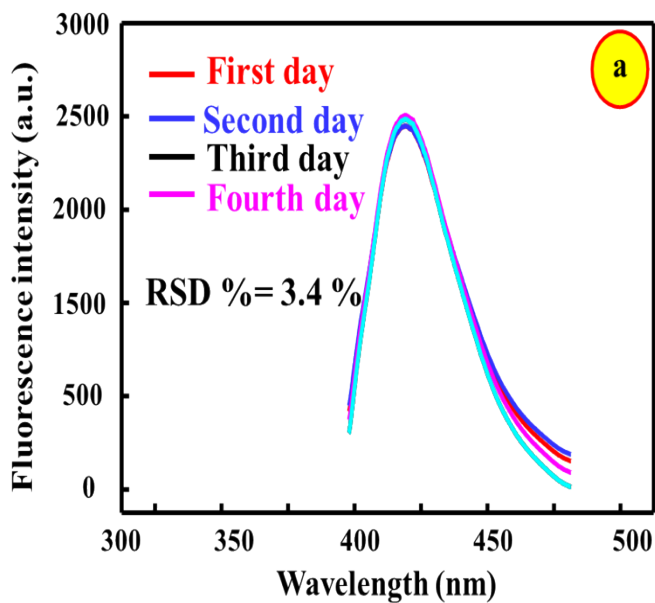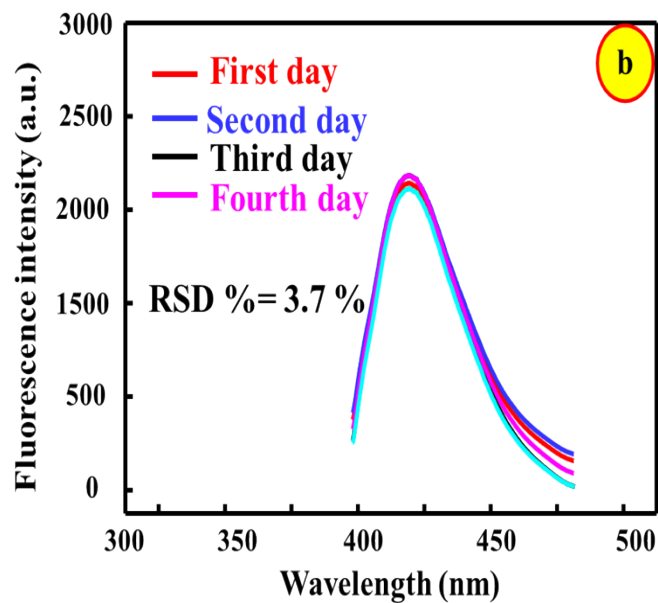

Fig.S5 Reproducibility of: (a) BN@CDs towards 25  $\mu\text{M}$   $\text{Al}^{3+}$ , (b) BN@CDs/ $\text{Al}^{3+}$  system towards 5  $\mu\text{M}$   $\text{F}^-$ .
